# Supplementary material for: Interaction Interface of Aβ42 with Human Na,K-ATPase Studied by MD and ITC and Inhibitor Screening by MD
Source: MDPI journal article supplement (doi:10.3390/biomedicines10071663), 2022-07-11
Supplement: s1 [file s1]

## Supplementary

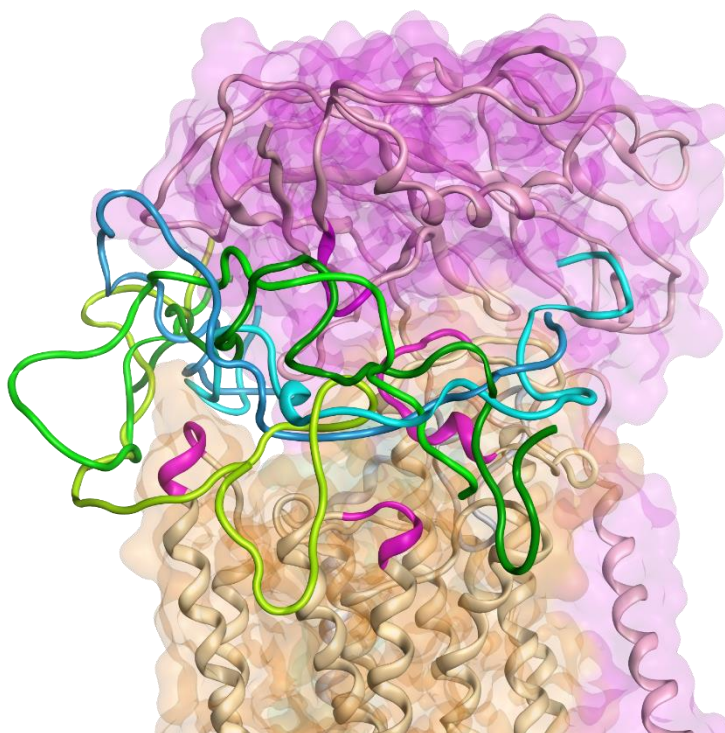

Figure S1. Five complexes of Na,K-ATPase with A $\beta_{42}$  obtained by fullblind docking as it described in methods section. A $\beta_{42}$  peptides are colored green and the probable interaction sites are colored magenta.

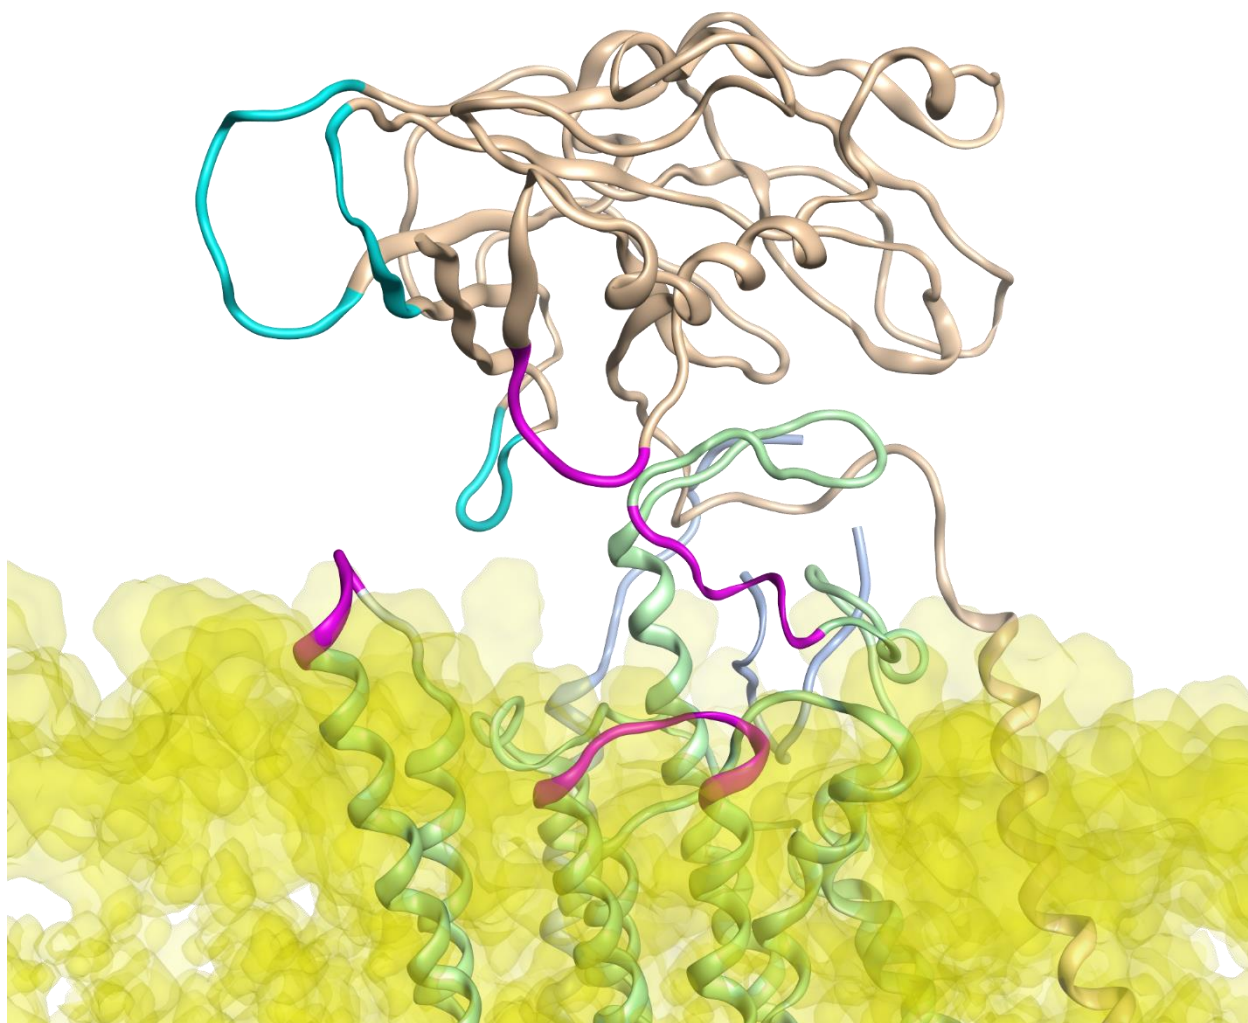

Figure S2. Interaction sites with A $\beta_{42}$  on E1P Na,K-ATPase after 50 ns MD. Sites 119-AATEE-124, 310-SLILEY-315 and 887-RVDWDDR-893 on  $\alpha$ -subunit and site 84-QKTEI-87 on  $\beta$ -subunit are concerned to present the main interaction interface and are colored with magenta. Other interaction sites 216-KRDEKDKVG-226, 267-TMDTEIR-273 and 285-YSEKDR-290 on  $\beta$ -subunit are colored with cyan.

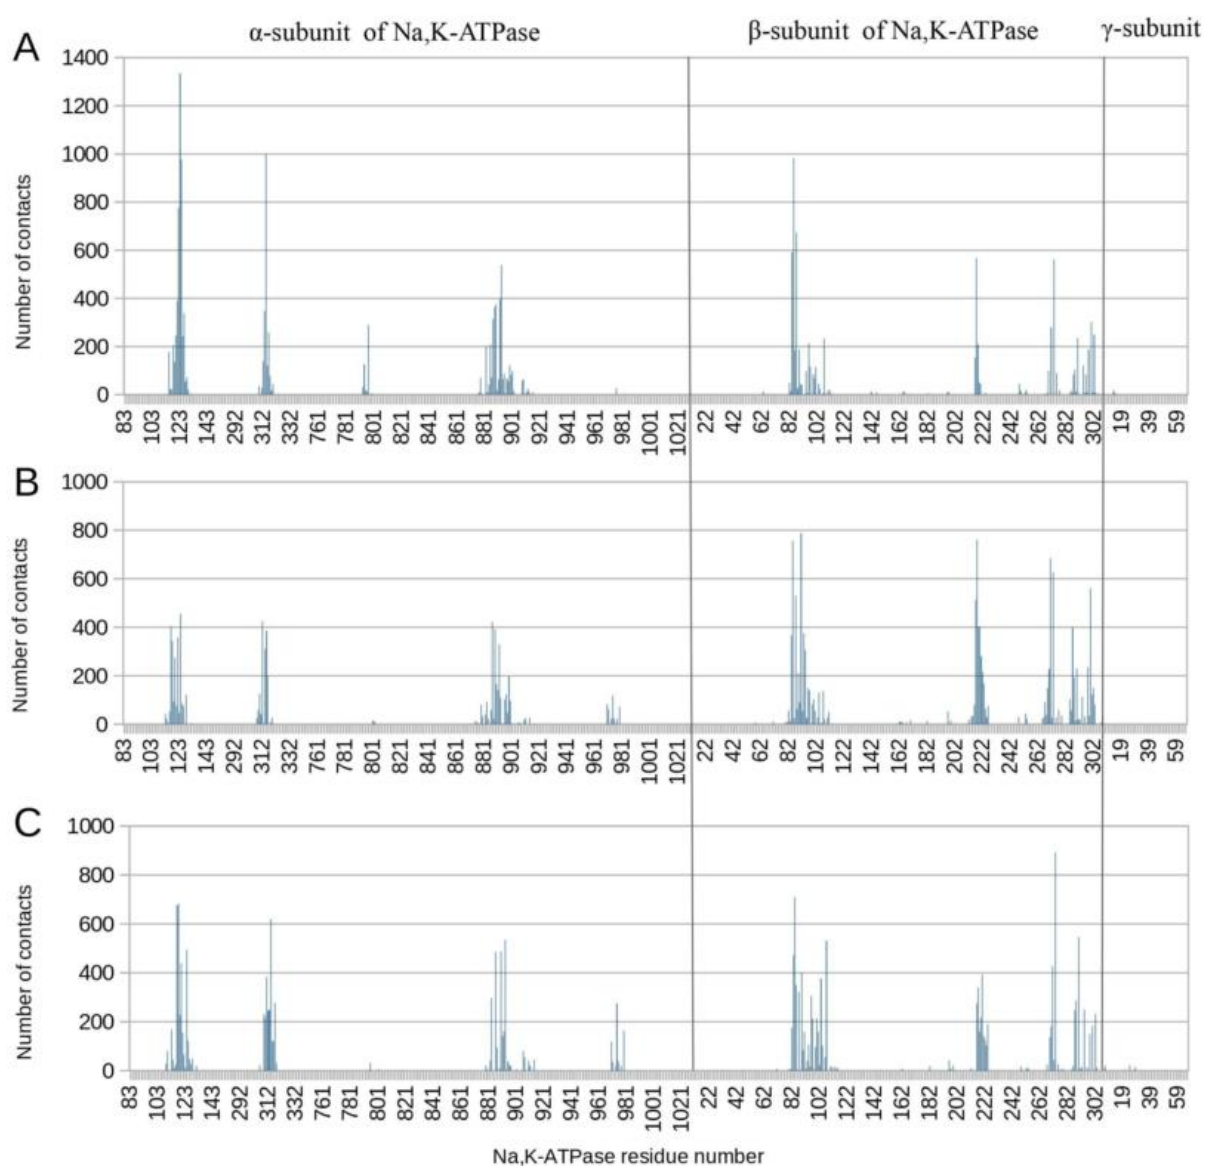

Figure S3. The number of intermolecular contacts with three  $A\beta$  isoforms after targeted global docking of E1P (A), E2P (B) and OBN (C) conformations of  $\alpha 1$  isoform of human Na, K-ATPase. The data for each conformation are summarized for 3  $A\beta$  isoforms and about 30 complexes from docking.
